# Supplementary material
Source: PubMed Central journal article supplement (PMC2206140)

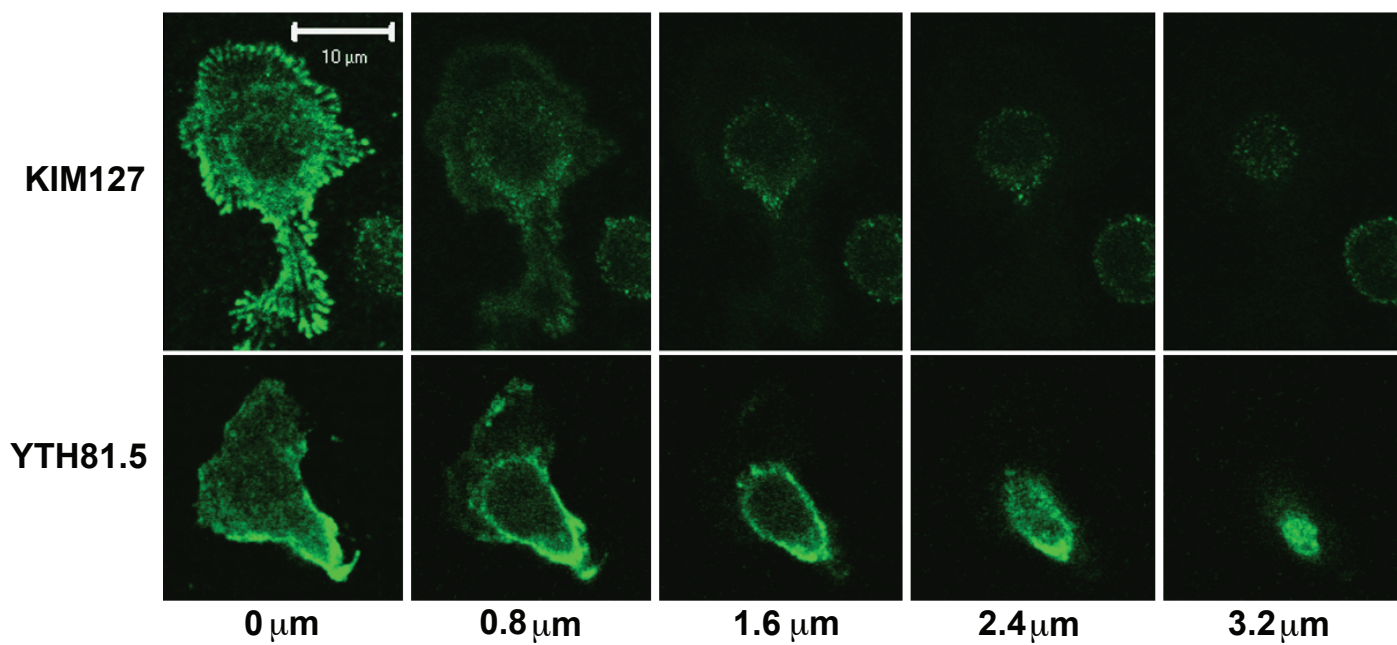

**Supplementary Data Fig 2**

Supplement: 7601959s10.pdf [file 7601959s10.pdf]

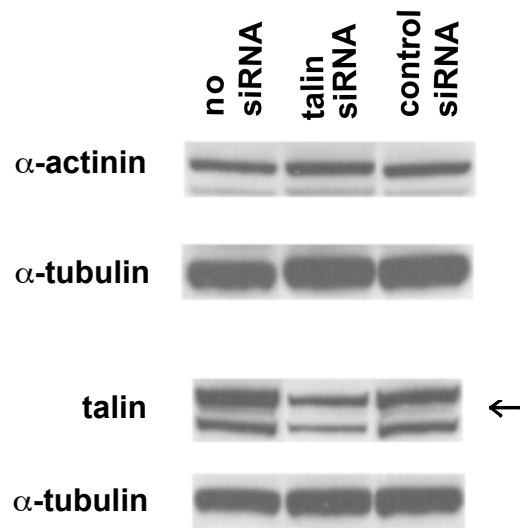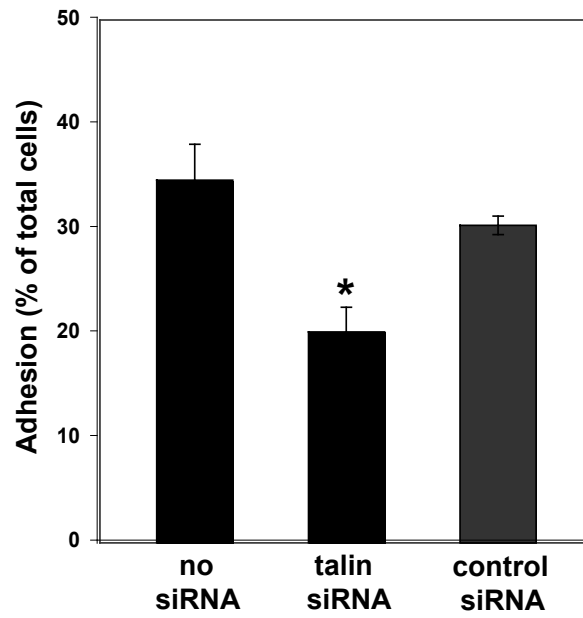

**Supplementary Data Fig 3**

Supplement: 7601959s11.pdf [file 7601959s11.pdf]

# KIM127

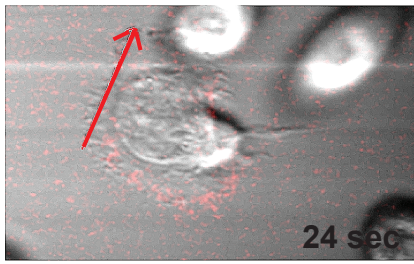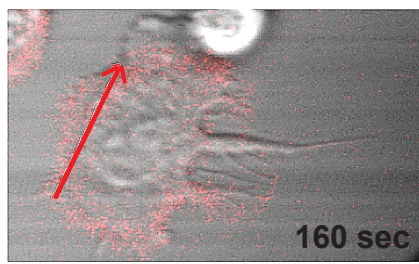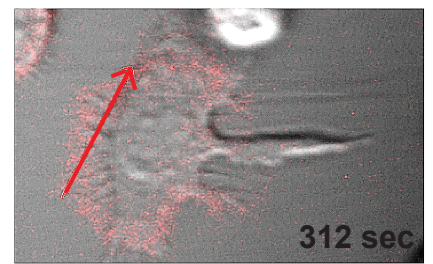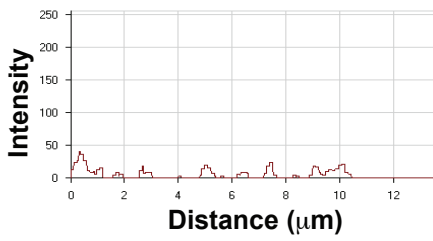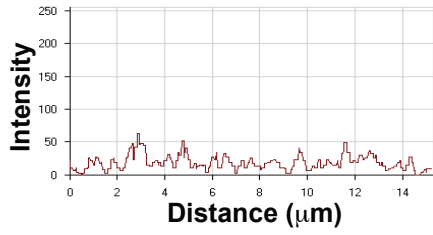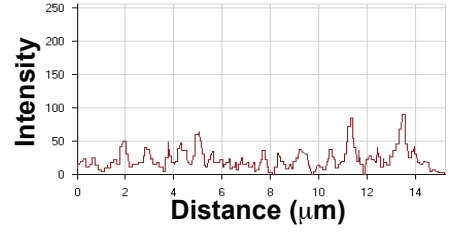

# 24

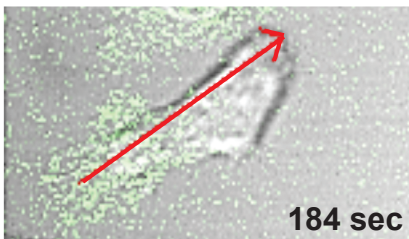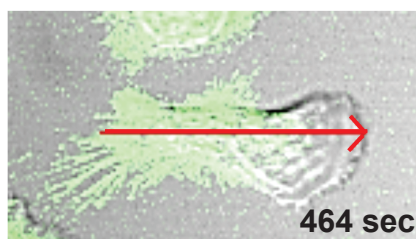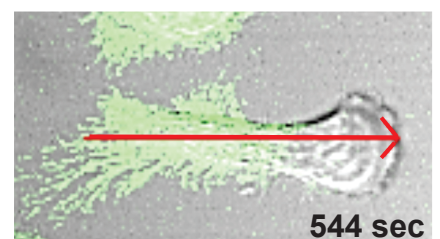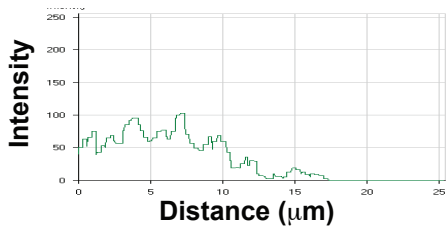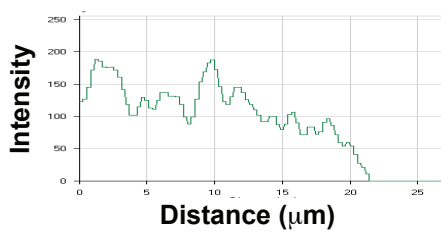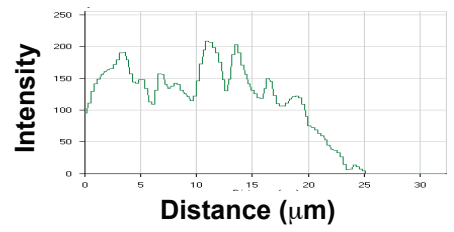

# Supplementary Data Fig 1

Supplement: 7601959s9.pdf [file 7601959s9.pdf]
